# Supplementary material
Source: MDPI journal article supplement (https://www.mdpi.com/2075-163X/11/5/514)
Supplement: s1 [file s1 › minerals-1145780-supplementary.pdf]

## ***Supplementary Material for***

# **A New Constraint on the Physicochemical Condition of Mars Surface During the Amazonian Epoch Based on Chemical Speciation for Secondary Minerals in Martian Nakhilites**

**Hiroki Suga <sup>1,\*,+</sup>, Keika Suzuki <sup>2,+</sup>, Tomohiro Usui <sup>3</sup>, Akira Yamaguchi <sup>4</sup>, Oki Sekizawa <sup>1</sup>, Kiyofumi Nitta <sup>1</sup>, Yasuo Takeichi <sup>5</sup>, Takuji Ohigashi <sup>6</sup> and Yoshio Takahashi <sup>2,+</sup>**

<sup>1</sup> Spectroscopy and Imaging Division, Japan Synchrotron Radiation Research Institute (JASRI/SPring-8), Hyogo 679-5198, Japan; sekizawa@spring8.or.jp (O.S.); nittak@spring8.or.jp (K.N.)

<sup>2</sup> Department of Earth and Planetary Science, Graduate School of Science, The University of Tokyo, Tokyo 113-0033, Japan.; 1614085@alumni.tus.ac.jp (K.S.); ytakaha@eps.s.u-tokyo.ac.jp (Yoshio Takahashi)

<sup>3</sup> Institute of Space and Astronautical Science (ISAS), Japan Aerospace Exploration Agency (JAXA), Kanagawa 252-5210, Japan; usui.tomohiro@jaxa.jp

<sup>4</sup> National Institute of Polar Research, Tokyo 190-8518, Japan.; yamaguch@nipr.ac.jp

<sup>5</sup> Institute of Materials Structure Science, High-Energy Accelerator Research Organization, Ibaraki 305-0801, Japan; yasuo.takeichi@kek.jp

<sup>6</sup> UVSOR facility, Institute for Molecular Science, Okazaki 444-8585, Japan; ohigashi@ims.ac.jp

\* Correspondence: hiroki-suga@spring8.or.jp; +81-791-58-0833

+ These authors contributed equally to this work

**Table S1.** Characteristics of the beamlines used in this study with information of the elements measured.

| Scale                                             | Bulk                |                     |                     | Micro               |                        |                    |
|---------------------------------------------------|---------------------|---------------------|---------------------|---------------------|------------------------|--------------------|
| SR-Facility                                       | Photon Factory      |                     |                     |                     | SPring-8               | UVSOR              |
| Beamline                                          | BL-12C <sup>1</sup> | BL-4A <sup>2</sup>  | BL-15A <sup>3</sup> | BL-19A <sup>4</sup> | BL37XU <sup>5</sup>    | BL4U <sup>6</sup>  |
| Method                                            | Bulk-XAFS           | $\mu$ XRF-XAFS      | $\mu$ XRF-XAFS      | STXM                | $\mu$ XRF-XAFS         | STXM               |
| Spatial Resolution<br>(Beam size: $\mu\text{m}$ ) | $600 \times 600$    | $5 \times 5$        | $20 \times 20$      | $0.03 \times 0.03$  | $0.1 \times 0.1$       | $0.07 \times 0.07$ |
| Detector                                          | Ge-SSD <sup>7</sup> | Si-SDD <sup>8</sup> | Si-SDD              | PMT <sup>9</sup>    | Si-SDD                 | PMT                |
| Energy Range (eV)                                 | 4000–23,000         | 6000–15,000         | 2100–5000           | 90–2000             | 4500–55,000            | 150–770            |
| Measured elements<br>(XAFS in this study)         | Cr (K-edge)         | Mn (K-edge)         | S (K-edge)          | Fe (L-edge)         | Cr, Mn, Fe<br>(K-edge) | S (L-edge)         |

<sup>1</sup> <https://pfxafs.kek.jp/beamlines/bl-12c/><sup>2</sup> [http://pfwww.kek.jp/users\\_info/station\\_spec/bl4/bl4a.html](http://pfwww.kek.jp/users_info/station_spec/bl4/bl4a.html)<sup>3</sup> <https://pfxafs.kek.jp/beamlines/bl-15a1/><sup>4</sup> [http://pfwww.kek.jp/users\\_info/station\\_spec/bl19/index.html](http://pfwww.kek.jp/users_info/station_spec/bl19/index.html) and reference [30].<sup>5</sup> [http://www.spring8.or.jp/wkg/BL37XU/instrument/lang/INS-0000000592/instrument\\_summary\\_view](http://www.spring8.or.jp/wkg/BL37XU/instrument/lang/INS-0000000592/instrument_summary_view)<sup>6</sup> <https://www.uvsor.ims.ac.jp/staff/BL4U/><sup>7</sup> Solid State Detector.<sup>8</sup> Silicon Drift Detector.<sup>9</sup> Photomultiplier tube.

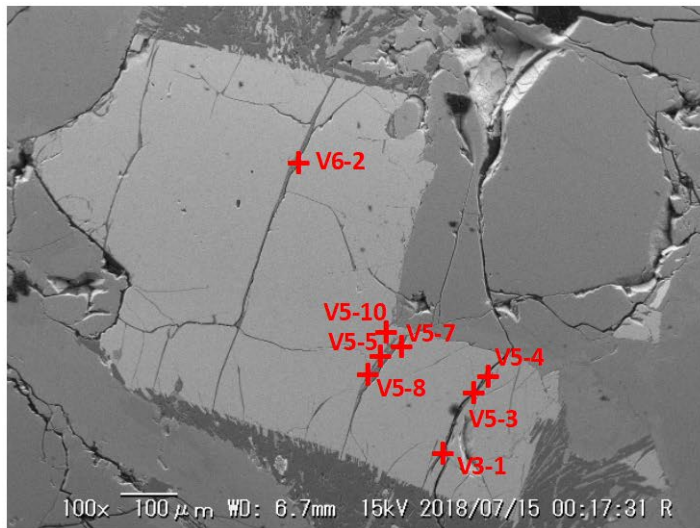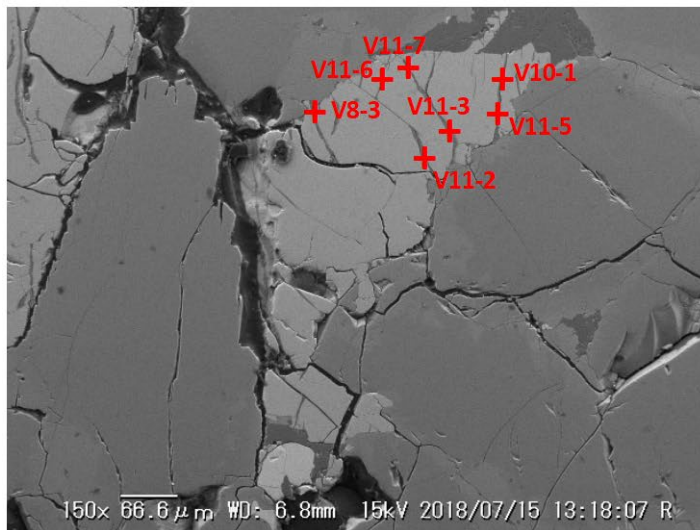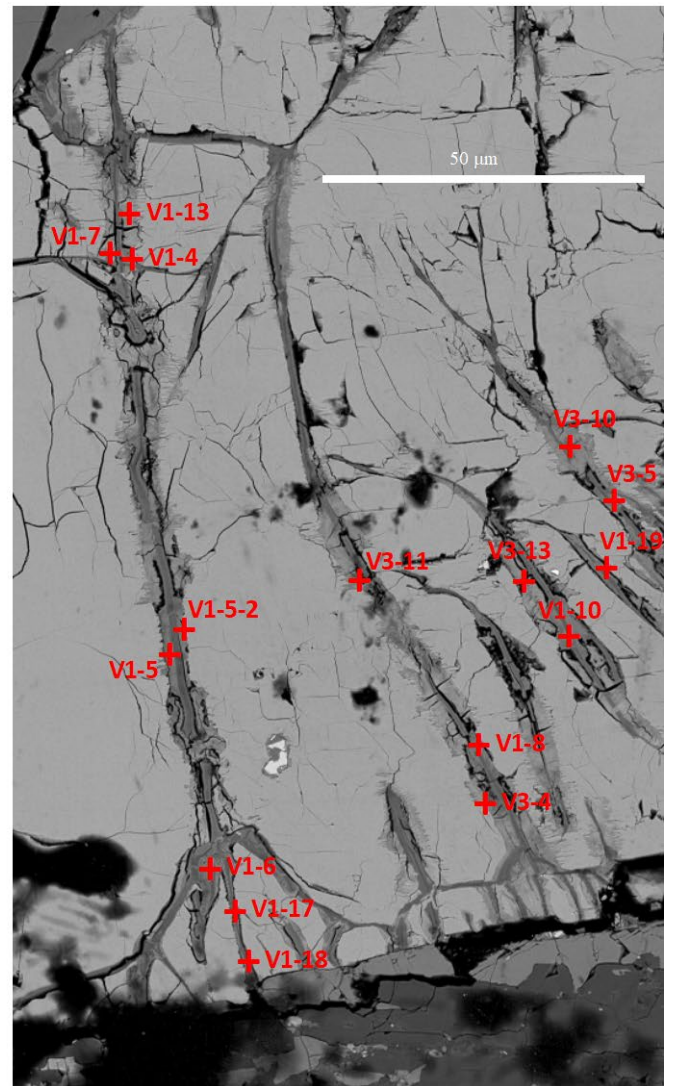

**Figure S1.** Carbonate analysis points plotted on backscattered electron (BSE) images. The field of view of each BSE image is the same as that in Figure 1 in the manuscript. The plotted name corresponds to the name of Table S2.

**Table S2.** Carbonate composition in iddingsite measured via electron microprobe analysis (wt.%). The name corresponds to the analysis point in Figure S1.

|                                | V1-4   | V1-5   | V1-6   | V1-5-2 | V1-7   | V1-8   | V1-10  | V1-13  | V1-17  | V1-18  | V1-19  | V3-4   | V3-5   | V3-10  | V3-11  | V3-13  | V5-1   | V5-3   | V5-4   | V5-5   | V5-7   | V5-8   | V5-10  | V6-2   | V8-3   | V10-1  | V11-2  | V11-3  | V11-5  | V11-6  | V11-7  | Nakha<br>Sd. <sup>a</sup> | Nakha<br>Mn-rich Sd. <sup>a</sup> | Nakha<br>Ol. <sup>b</sup> | Lafayette<br>Ol. <sup>b</sup> | GV<br>Ol. <sup>b</sup> | ALH84001 <sup>c</sup> | Comanche<br>cutcrop <sup>d</sup> | Terrestrial<br>calcite <sup>e</sup> |        |        |
|--------------------------------|--------|--------|--------|--------|--------|--------|--------|--------|--------|--------|--------|--------|--------|--------|--------|--------|--------|--------|--------|--------|--------|--------|--------|--------|--------|--------|--------|--------|--------|--------|--------|---------------------------|-----------------------------------|---------------------------|-------------------------------|------------------------|-----------------------|----------------------------------|-------------------------------------|--------|--------|
| SiO <sub>2</sub>               |        |        |        |        |        |        |        |        |        |        |        |        |        |        |        |        |        |        |        |        |        |        |        |        |        |        |        |        |        |        |        | 2.2                       | 0.3                               | 1.6                       |                               | 4.9                    | 0.1                   |                                  | 0.5                                 |        |        |
| Al <sub>2</sub> O <sub>3</sub> |        |        |        |        |        |        |        |        |        |        |        |        |        |        |        |        |        |        |        |        |        |        |        |        |        |        |        |        |        |        |        | 0.2                       | 0.1                               |                           |                               |                        |                       |                                  |                                     |        |        |
| FeO                            | 20.38  | 21.00  | 22.27  | 26.69  | 39.07  | 37.85  | 25.95  | 46.54  | 46.61  | 35.47  | 20.22  | 38.06  | 35.32  | 36.70  | 44.60  | 47.15  | 54.99  | 42.72  | 52.31  | 20.69  | 43.26  | 35.04  | 45.89  | 49.21  | 20.03  | 43.88  | 32.93  | 41.24  | 42.88  | 39.25  | 39.99  | 39.3                      | 24.5                              | 45.5                      | 31.3                          | 43.6                   | 21.9                  | 19.2                             | 1.1                                 |        |        |
| MgO                            | 9.18   | 9.52   | 9.67   | 4.28   | 10.25  | 1.54   | 4.55   | 0.98   | 1.82   | 2.10   | 11.52  | 2.61   | 2.11   | 4.16   | 2.60   | 3.31   | 1.56   | 8.93   | 5.43   | 5.75   | 1.81   | 1.24   | 2.96   | 5.49   | 4.26   | 10.01  | 6.11   | 8.01   | 6.53   | 10.32  | 9.74   | 13.8                      | 7.0                               | 5.6                       | 6.2                           | 24.2                   | 26.2                  |                                  |                                     |        |        |
| MnO                            | 26.87  | 26.37  | 25.99  | 25.09  | 1.26   | 11.40  | 22.91  | 4.20   | 7.68   | 9.55   | 22.96  | 10.05  | 13.94  | 5.29   | 7.23   | 4.96   | 3.20   | 1.16   | 1.19   | 29.06  | 9.38   | 14.92  | 4.96   | 1.08   | 31.76  | 1.04   | 16.94  | 8.71   | 1.77   | 1.13   | 0.97   | 1.1                       | 19.9                              | 3.1                       | 13.0                          | 1.1                    | 0.8                   | 1.4                              |                                     |        |        |
| CaO                            | 1.40   | 1.35   | 1.32   | 2.08   | 5.94   | 3.59   | 2.22   | 2.38   | 3.39   | 3.81   | 1.25   | 3.26   | 3.40   | 2.91   | 2.94   | 2.96   | 3.08   | 5.26   | 2.89   | 0.93   | 3.41   | 3.35   | 3.50   | 1.88   | 1.72   | 4.98   | 2.35   | 2.03   | 4.76   | 7.06   | 5.48   | 2.3                       | 0.2                               | 0.9                       | 14.9                          | 1.5                    | 6.7                   | 6.6                              | 51.1                                |        |        |
| Na <sub>2</sub> O              | 0.02   | 0.01   | 0.02   | 0.10   | 0.11   | 0.13   | 0.09   | 0.05   | 0.04   | 0.15   | 0.07   | 0.06   | 0.05   | 0.02   | 0.02   | 0.03   | 0.01   | 0.07   | 0.09   | 0.02   | 0.02   | 0.02   | 0.06   | 0.18   | 0.01   | 0.09   | 0.04   | 0.06   | 0.06   | 0.17   | 0.10   | 0.3                       | 1.7                               | 1.5                       | 1.1                           |                        | 0.3                   |                                  |                                     |        |        |
| K <sub>2</sub> O               |        |        |        |        |        |        |        |        |        |        |        |        |        |        |        |        |        |        |        |        |        |        |        |        |        |        |        |        |        |        |        |                           | 0.4                               |                           |                               |                        |                       |                                  |                                     |        |        |
| P <sub>2</sub> O <sub>5</sub>  |        |        |        |        |        |        |        |        |        |        |        |        |        |        |        |        |        |        |        |        |        |        |        |        |        |        |        |        |        |        |        | 0.1                       |                                   | 0.5                       |                               |                        |                       |                                  |                                     |        |        |
| SO <sub>3</sub>                | 0.13   | 0.11   | 0.12   | 0.30   | 0.27   | 0.15   | 0.15   | 0.11   | 0.20   | 0.21   | 0.17   | 0.20   | 0.14   | 0.26   | 0.15   | 0.17   | 0.29   | 0.24   | 0.06   | 0.02   | 0.20   | 0.22   | 0.13   | 0.10   | 0.12   | 0.22   | 0.36   | 0.28   | 0.12   | 0.20   | 0.10   | 0.1                       | 2.1                               |                           |                               |                        |                       |                                  |                                     |        |        |
| Cr <sub>2</sub> O <sub>3</sub> |        |        |        |        |        |        |        |        |        |        |        |        |        |        |        |        |        |        |        |        |        |        |        |        |        |        |        |        |        |        |        |                           | 0.1                               | 0.2                       |                               |                        |                       |                                  |                                     |        |        |
| Cl                             |        |        |        |        |        |        |        |        |        |        |        |        |        |        |        |        |        |        |        |        |        |        |        |        |        |        |        |        |        |        |        |                           | 0.3                               | 1.0                       |                               |                        |                       |                                  |                                     |        |        |
| CO <sub>3</sub> <sup>f</sup>   | 42.03  | 41.65  | 40.62  | 41.48  | 43.11  | 45.35  | 44.14  | 45.74  | 40.27  | 48.71  | 43.81  | 45.76  | 45.04  | 50.66  | 42.46  | 41.43  | 36.88  | 41.63  | 38.02  | 43.53  | 41.93  | 45.21  | 42.50  | 42.07  | 42.11  | 39.78  | 41.27  | 39.67  | 43.88  | 41.88  | 43.62  | 40.4                      | 42.5                              | 41.2                      | 39.7                          | 42.7                   | 46.0                  | 46.6                             | 47.3                                |        |        |
| Total                          | 100.00 | 100.00 | 100.00 | 100.00 | 100.00 | 100.00 | 100.00 | 100.00 | 100.00 | 100.00 | 100.00 | 100.00 | 100.00 | 100.00 | 100.00 | 100.00 | 100.00 | 100.00 | 100.00 | 100.00 | 100.00 | 100.00 | 100.00 | 100.00 | 100.00 | 100.00 | 100.00 | 100.00 | 100.00 | 100.00 | 100.00 | 100.00                    | 100.00                            | 100.00                    | 100.00                        | 100.00                 | 100.00                | 100.00                           | 100.00                              | 100.00 | 100.00 |
| Compisation (mol%)             |        |        |        |        |        |        |        |        |        |        |        |        |        |        |        |        |        |        |        |        |        |        |        |        |        |        |        |        |        |        |        |                           |                                   |                           |                               |                        |                       |                                  |                                     |        |        |
| Calcite                        | 2.72   | 2.60   | 2.50   | 4.27   | 11.49  | 8.10   | 4.73   | 5.49   | 7.02   | 9.07   | 2.44   | 7.32   | 7.56   | 7.00   | 6.24   | 6.13   | 6.07   | 10.13  | 5.53   | 1.94   | 7.24   | 7.58   | 7.39   | 3.85   | 3.56   | 9.23   | 4.70   | 3.89   | 9.76   | 13.33  | 10.74  | 4.34                      | 0.45                              | 1.93                      | 30.04                         | 3.33                   | 11.53                 | 11.16                            | 98.35                               |        |        |
| Magnesite                      | 24.89  | 25.56  | 25.53  | 12.22  | 27.59  | 4.85   | 13.49  | 3.15   | 5.24   | 6.95   | 31.29  | 8.15   | 6.53   | 13.94  | 7.69   | 9.54   | 4.29   | 23.92  | 14.47  | 16.64  | 5.34   | 3.89   | 8.70   | 15.65  | 12.25  | 25.80  | 17.02  | 21.33  | 18.65  | 27.12  | 26.58  | 36.20                     | 21.74                             | 16.70                     | 0.00                          | 19.16                  | 57.96                 | 61.63                            | 0.00                                |        |        |
| Rhodochrosite                  | 41.40  | 40.23  | 38.99  | 40.73  | 1.92   | 20.34  | 38.60  | 7.64   | 12.54  | 17.99  | 35.45  | 17.83  | 24.54  | 10.08  | 12.13  | 8.12   | 4.98   | 1.76   | 1.80   | 47.81  | 15.74  | 26.67  | 8.29   | 1.75   | 51.89  | 1.52   | 26.82  | 13.18  | 2.88   | 1.69   | 1.50   | 1.64                      | 35.12                             | 5.25                      | 20.72                         | 1.93                   | 1.09                  | 1.87                             | 0.00                                |        |        |
| Siderite                       | 31.00  | 31.62  | 32.98  | 42.78  | 59.00  | 66.71  | 43.17  | 83.72  | 75.20  | 65.98  | 30.82  | 66.70  | 61.37  | 68.99  | 73.94  | 76.22  | 84.65  | 64.19  | 78.20  | 33.61  | 71.69  | 61.86  | 75.62  | 78.75  | 32.31  | 63.44  | 51.66  | 68.71  | 57.86  | 61.19  | 57.83  | 42.69                     | 76.12                             | 45.25                     | 75.58                         | 29.42                  | 25.34                 | 1.65                             |                                     |        |        |

Abbreviations: V...: name of measuring points shown in Figure S1; GV: Governador Valadares; Sd: siderite; Ol: olivine.

<sup>a</sup> Bridges and Grady, 2000 [26].  
<sup>b</sup> Bridges et al., 2019 [53].  
<sup>c</sup> Mittlefehldt, 1994 [52].  
<sup>d</sup> Morris et al., 2010 [51].  
<sup>e</sup> Terrestrial calcite of NWA 817 reported in Bridges and Schwenzer, 2012 [25].  
<sup>f</sup> CO<sub>2</sub> was calculated by differences.

References:

25. Bridges, J.C.; Schwenzer, S.P. The nakhlite hydrothermal brine on Mars. *Earth Planet. Sci. Lett.* **2012**, *359–360*, 117–123.

26. Bridges, J.C.; Grady, M.M. Evaporite mineral assemblages in the nakhlite (Martian) meteorites. *Earth Planet. Sci. Lett.* **2000**, *176*, 267–279.

51. Morris, R.V.; Ruff, S.W.; Gellert, R.; Ming, D.W.; Arvidson, R.E.; Clark, B.C.; Golden, D.C.; Siebach, K.; Klingelhöfer, G.; Schröder, C.; et al. Identification of Carbonate-Rich Outcrops on Mars by the Spirit Rover. *Science* **2010**, *329*, 421–424.

52. Mittlefehldt, D.W. ALH84001, a cumulate orthopyroxenite member of the Martian meteorite clan. *Meteorit. Planet. Sci.* **1994**, *29*, 214–221.

53. Bridges, J.C.; Hicks, L.J.; Treiman, A.H. Carbonates on Mars. In *Volatiles in the Martian Crust*; Elsevier: Amsterdam, The Netherlands, 2019; Chapter 5, pp. 89–118, doi:10.1016/B978-0-12-804191-8.00005-2.

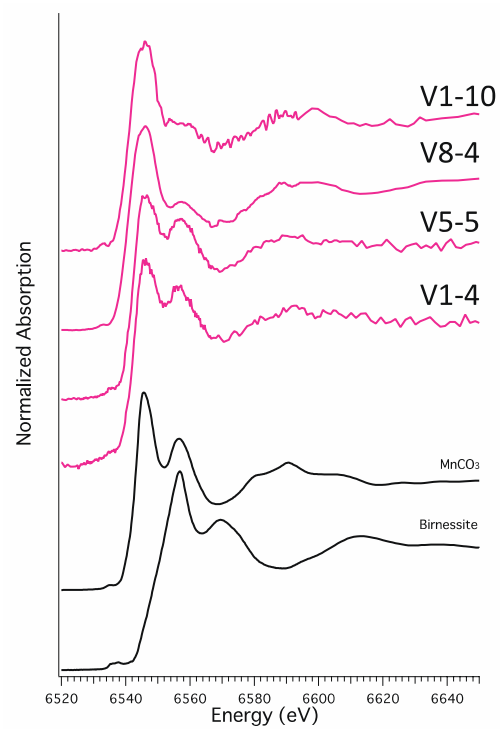

**Figure S2.** Representative Mn K-edge XANES spectra (pink spectra) obtained from the Mn-bearing carbonate iddingsite. The Mn is present as Mn carbonate considering the spectra of standard materials. The legend corresponds to the name in Figure S1.

**Table S3.** Sulfate content in iddingsite measured via electron microprobe analysis (wt.%).

| Measureing point               | 1      | 2      | 3      | 4      | 5      | 6      | 7      | 8      | 9      | 10     | 11     | 12     | 13     | 14     | 15     | 16     | 17     | 18     | 19     | 20     | 21     | 22     | 23     | 24     | 25     | 26     | 27     | 28     | 29     | 30     | 31     |
|--------------------------------|--------|--------|--------|--------|--------|--------|--------|--------|--------|--------|--------|--------|--------|--------|--------|--------|--------|--------|--------|--------|--------|--------|--------|--------|--------|--------|--------|--------|--------|--------|--------|
| F                              | 0      | 0      | 0      | 0.013  | 0      | 0      | 0.036  | 0.089  | 0      | 0.101  | 0      | 0      | 0      | 0      | 0      | 0      | 0      | 0.023  | 0.013  | 0      | 0      | 0      | 0      | 0.059  | 0.072  | 0      | 0      | 0      | 0      | 0      | 0.013  |
| Na <sub>2</sub> O              | 0.092  | 0.044  | 0      | 0.028  | 0.01   | 0      | 0.011  | 0.083  | 0      | 0.088  | 0.081  | 0      | 0.063  | 0      | 0.003  | 0.032  | 0.102  | 0.04   | 0.107  | 0.056  | 0.037  | 0.04   | 0.01   | 0.067  | 0.017  | 0.024  | 0      | 0.094  | 0.028  | 0.031  | 0.032  |
| MgO                            | 5.493  | 5.945  | 5.782  | 7.556  | 4.17   | 7.286  | 1.577  | 4.312  | 5.65   | 4.331  | 4.734  | 1.613  | 4.794  | 1.347  | 3.221  | 1.375  | 4.149  | 1.911  | 7.3    | 4.753  | 6.048  | 5.811  | 4.778  | 1.595  | 4.557  | 3.605  | 3.456  | 4.106  | 3.534  | 2.959  | 6.142  |
| Al <sub>2</sub> O <sub>3</sub> | 1.136  | 1.276  | 1.005  | 0.817  | 0.808  | 0.879  | 0.479  | 0.801  | 0.73   | 0.643  | 0.71   | 0      | 0.461  | 0.457  | 0.631  | 0.545  | 0.536  | 0.567  | 0.562  | 0.673  | 0.476  | 0.818  | 0.55   | 0.551  | 0.471  | 0.628  | 0.477  | 0.453  | 0.607  | 0.591  | 0.763  |
| SiO <sub>2</sub>               | 56.139 | 44.26  | 57.839 | 55.993 | 55.457 | 57.895 | 25.782 | 51.211 | 57.524 | 49.4   | 55.913 | 20.736 | 34.345 | 33.107 | 52.476 | 36.517 | 48.528 | 32.799 | 50.37  | 48.12  | 46.524 | 50.971 | 44.536 | 36.325 | 38.8   | 37.987 | 30.364 | 30.261 | 35.413 | 46.817 | 55.139 |
| SO <sub>3</sub>                | 0.2    | 0.259  | 0.205  | 0.31   | 0.203  | 0.32   | 0.202  | 0.255  | 0.248  | 0.299  | 0.216  | 0.284  | 0.148  | 0.296  | 0.189  | 0.195  | 0.25   | 0.232  | 0.233  | 0.125  | 0.171  | 0.206  | 0.137  | 0.253  | 0.224  | 0.17   | 0.15   | 0.186  | 0.118  | 0.147  | 0.113  |
| CaO                            | 1.093  | 1.928  | 0.3    | 0.456  | 1.421  | 0.749  | 1.232  | 1.308  | 0.249  | 1.316  | 0.736  | 4.159  | 2.12   | 1.499  | 0.974  | 1.024  | 1.155  | 1.165  | 1.475  | 1.166  | 0.496  | 1.259  | 1.267  | 2.122  | 2.193  | 1.844  | 2.507  | 3.387  | 2.001  | 0.811  | 0.497  |
| TiO <sub>2</sub>               | 0.185  | 0.202  | 0      | 0.112  | 0.109  | 0.147  | 0.122  | 0.078  | 0.165  | 0.031  | 0.052  | 0.102  | 0.13   | 0.059  | 0.007  | 0.05   | 0.077  | 0.044  | 0.096  | 0.086  | 0.091  | 0      | 0.158  | 0.037  | 0      | 0.06   | 0.153  | 0.143  | 0.036  | 0.115  | 0.03   |
| Cl                             | 0.009  | 0      | 0      | 0.004  | 0      | 0      | 0.036  | 0.016  | 0      | 0.028  | 0      | 0.014  | 0.037  | 0.024  | 0      | 0.016  | 0      | 0.008  | 0      | 0.039  | 0.022  | 0.041  | 0      | 0.002  | 0.003  | 0      | 0      | 0      | 0.008  | 0      | 0.019  |
| K <sub>2</sub> O               | 0.08   | 0.022  | 0.097  | 0.008  | 0.143  | 0.141  | 0.087  | 0.13   | 0.108  | 0.083  | 0.079  | 0.015  | 0.032  | 0.057  | 0.132  | 0.109  | 0.148  | 0.031  | 0.117  | 0.124  | 0.059  | 0.095  | 0.097  | 0.051  | 0.096  | 0.033  | 0.003  | 0.014  | 0.049  | 0.04   | 0.056  |
| P <sub>2</sub> O <sub>5</sub>  | 0      | 0.122  | 0.08   | 0      | 0.07   | 0      | 0      | 0.022  | 0      | 0      | 0.021  | 0      | 0      | 0      | 0.099  | 0.032  | 0.028  | 0      | 0.079  | 0.018  | 0      | 0.026  | 0      | 0.004  | 0      | 0.053  | 0      | 0.092  | 0      | 0.04   | 0      |
| FeO                            | 24.247 | 27.907 | 25.609 | 22.833 | 27.491 | 22.83  | 24.852 | 27.611 | 26.949 | 29.468 | 27.392 | 54.841 | 25.582 | 24.848 | 30.535 | 28.691 | 26.342 | 31.579 | 26.313 | 27.836 | 32.878 | 30.419 | 27.144 | 31.874 | 31.901 | 27.999 | 35.741 | 43.89  | 31.897 | 29.036 | 25.146 |
| MnO                            | 0.577  | 1.273  | 0.612  | 0.592  | 1.442  | 0.842  | 2.805  | 2.016  | 0.841  | 1.288  | 1.096  | 5.346  | 7.392  | 3.065  | 1.396  | 1.1    | 0.926  | 0.807  | 1.204  | 0.898  | 1.111  | 0.75   | 0.949  | 0.801  | 0.845  | 1.094  | 1.784  | 1.923  | 1.115  | 0.901  | 0.614  |
| Cr <sub>2</sub> O <sub>3</sub> | 0      | 0.053  | 0.017  | 0.061  | 0.051  | 0.104  | 0.034  | 0.07   | 0.031  | 0      | 0.085  | 0.122  | 0.028  | 0.031  | 0.006  | 0.024  | 0      | 0.01   | 0.107  | 0.061  | 0.023  | 0      | 0.011  | 0.028  | 0.058  | 0      | 0      | 0.055  | 0.013  | 0.006  | 0.129  |
| Total                          | 89.249 | 83.291 | 91.546 | 88.777 | 91.375 | 91.193 | 57.232 | 87.961 | 92.495 | 87.027 | 91.115 | 87.229 | 75.124 | 64.785 | 89.669 | 69.706 | 82.241 | 69.205 | 87.971 | 83.946 | 86.931 | 90.427 | 79.637 | 73.744 | 79.206 | 73.497 | 74.635 | 84.604 | 74.817 | 81.494 | 88.683 |

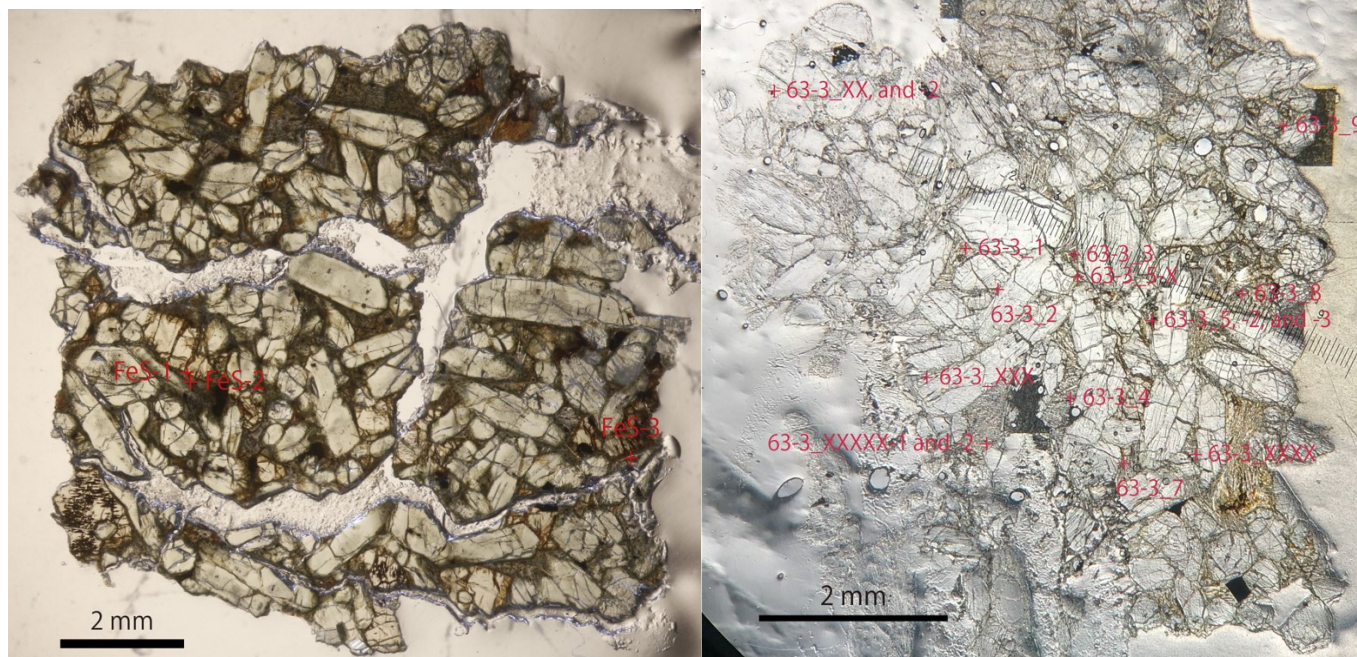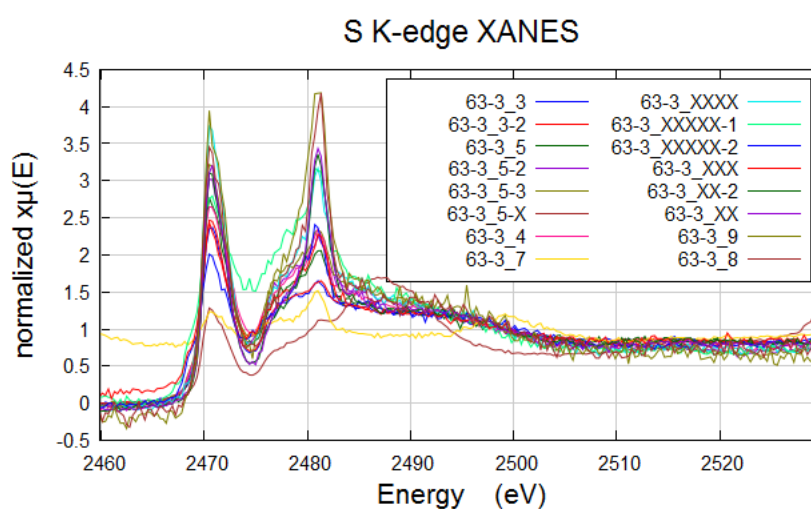

**Figure S3.** Analysis points of iron sulfides plotted on the optical microscopic images of PTS 58-1 (left) and 63-3 (right) with S-XANES spectra. Part of the “+” marks in this figure correspond to the S-XANES spectra shown in Figure 5c in the manuscript. In the case of one “+” mark with more than one measurement name, the microscopic iron sulfide (not visible on this scale) near the “+” mark was also analyzed. S-XANES spectra of oxidized iron sulfides in PTS 63-3, which was not included in the manuscript, are also shown. The S-XANES spectra were plotted by using Athena software; the photon energy was not calibrated in detail.

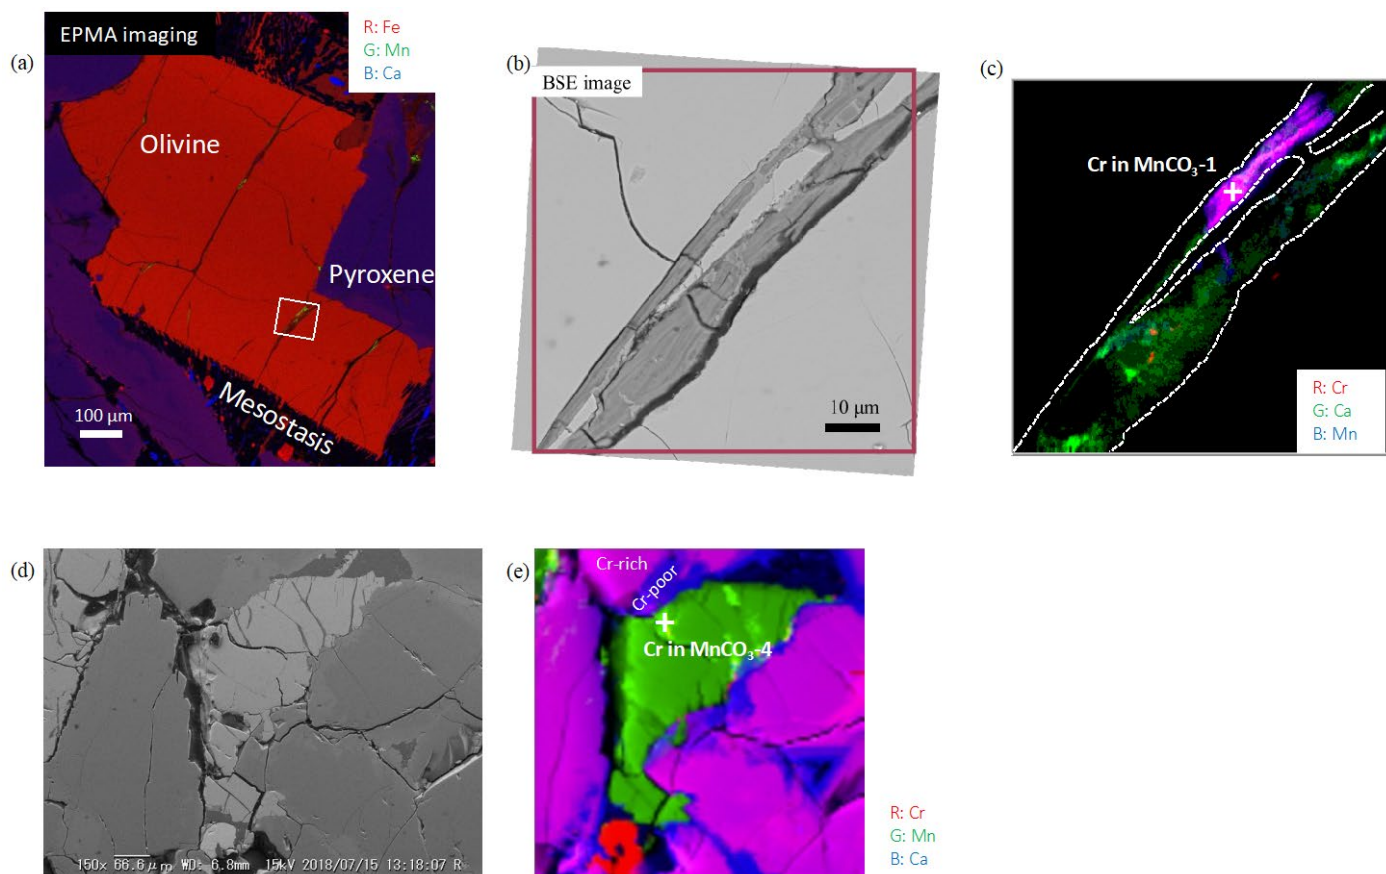

**Figure S4.** Analysis points of Cr-XANES indicated over the BSE, RPMA, and  $\mu$ -XRF images. (a) RGB elemental image obtained through EPMA elemental mapping. (b) High-magnification BSE image of the white square region in (a). (c) RGB elemental image obtained by  $\mu$ -XRF mapping. Cr-rich Mn-siderite is clearly shown as a purple-colored portion. The Cr-XANES spectrum “Cr in  $\text{MnCO}_3$ -1” was obtained from the position marked “+” in this image. (d) BSE image of another analysis area, which is also shown in Figure 1 in the manuscript. (e) RGB elemental image obtained by  $\mu$ -XRF mapping. The Cr-rich Mn-siderite is clearly shown as a yellow–light green-colored portion. The Cr-XANES spectrum “Cr in  $\text{MnCO}_3$ -4” was obtained from the position marked “+” in this image. In addition, Cr zoning was confirmed in the surrounding pyroxenes.
